# Supplementary material
Source: PubMed Central journal article supplement (PMC3856600)
Supplement: Supp_Figure3.pdf [file Supp_Figure3.pdf]

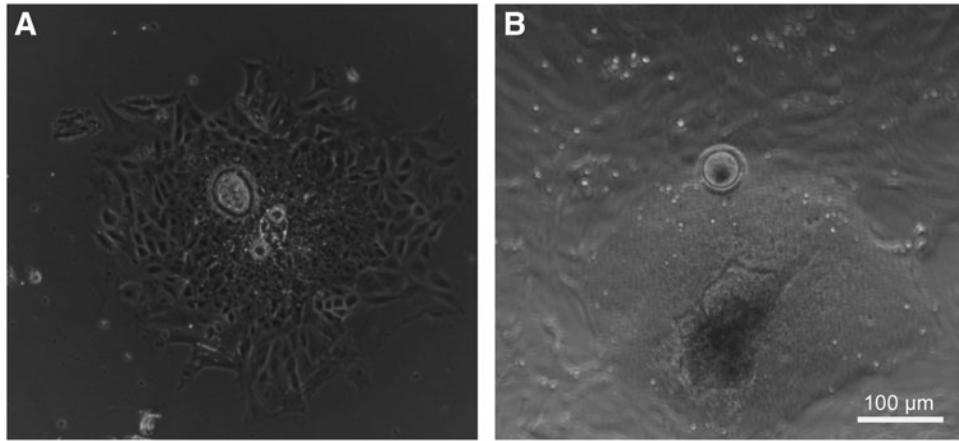

**SUPPLEMENTARY FIG. S3.** Typical morphology of the degenerated follicles isolated by the (A) enzymatic and (B) mechanical methods after culturing using the MD method from day 0 to 6: the theca and granulosa cells diffused away and attached on the dish, resulting in exposed and eventually degenerated oocytes. MD, microliter drop.
