# Supplementary material
Source: PubMed Central journal article supplement (PMC3856600)
Supplement: Supp_Figure4.pdf [file Supp_Figure4.pdf]

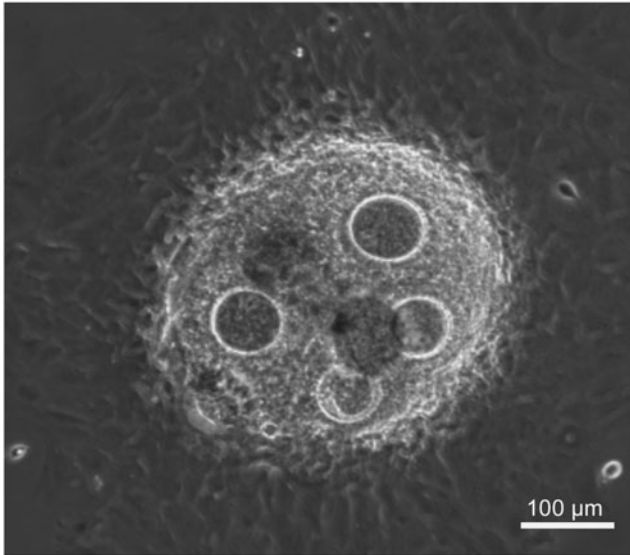

**SUPPLEMENTARY FIG. S4.** Typical morphology of the degenerated follicle aggregate after culturing in MD from day 7 to 13: the theca and granulosa cells diffused away and attached on the dish, resulting in exposed and eventually degenerated oocytes. The follicle aggregate was formed by culturing five early secondary preantral follicles in one HD of the nonconditioned medium. HD, hanging drop.
